# Supplementary material for: (Bipyridine bisphenolate)-aluminum/onium salt pair: a highly active binary catalyst for ring-opening polymerization of lactide with improved thermostability and protic tolerance
Source: Royal Society of Chemistry journal article supplement (doi:10.1039/d2py01273a), 2022-11-16
Supplement: d2py01273a1.pdf [file d2py01273a1.pdf]

## Supporting Information

**(Bipyridine bisphenolate)-aluminum/onium salt pair: A highly active binary catalysts for ring-opening polymerization of lactide with improved thermostability and protic tolerance**

Mingqian Wang, Zhiqiang Ding, Bin Wang\* and Yue-Sheng Li

\* Corresponding author: [binwang@tju.edu.cn](mailto:binwang@tju.edu.cn) (B.W.)

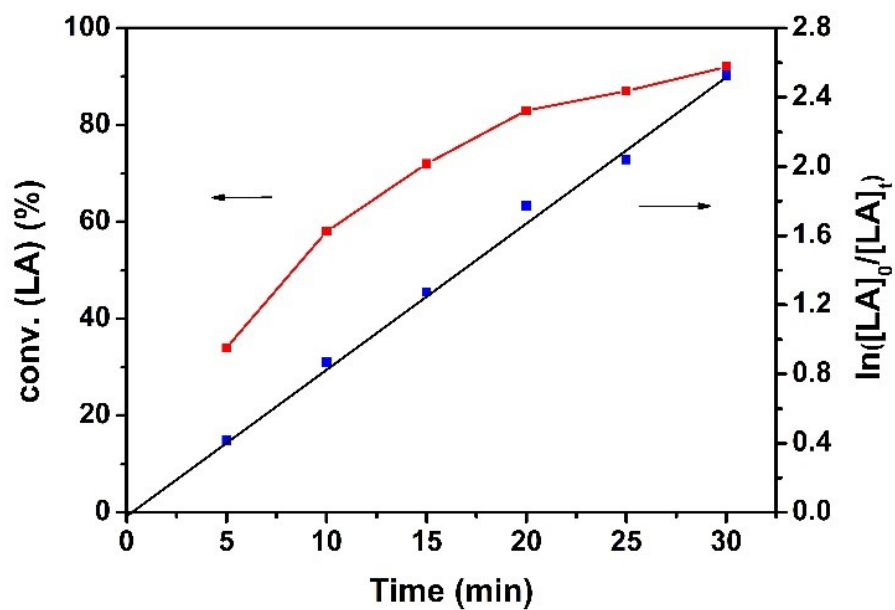

**Figure S1.** The polymerization kinetic plot for ring-opening polymerization.

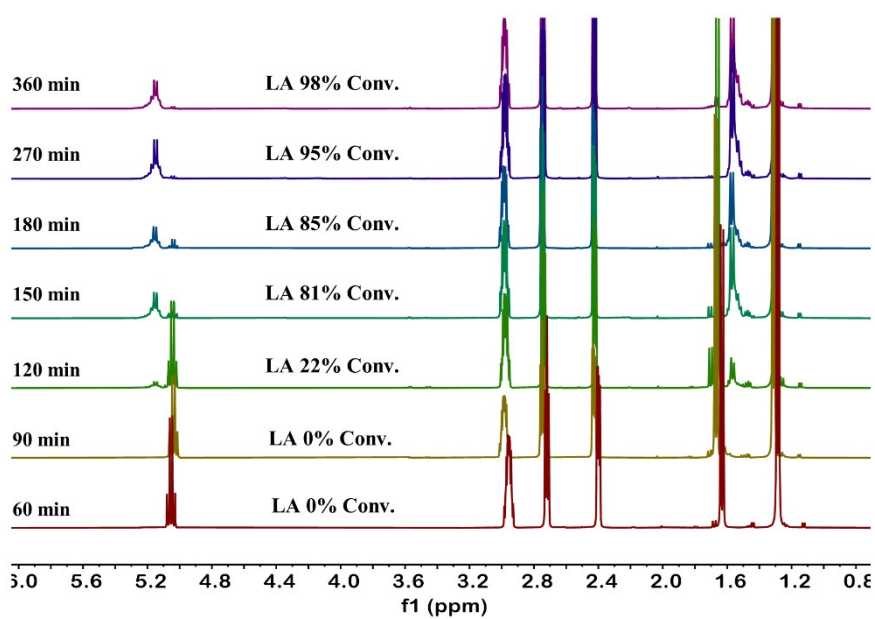

**Figure S2.** The  $^1\text{H}$  NMR spectra of the LA polymerization mixture by using PPnCl as catalyst.

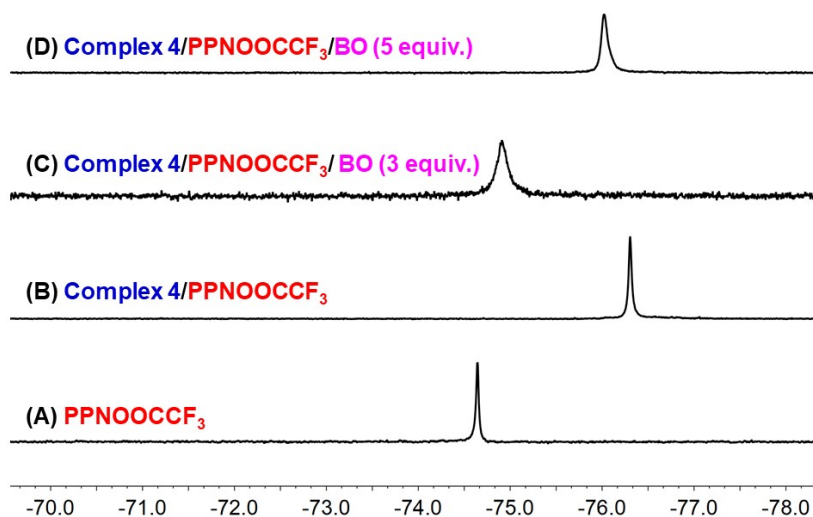

**Figure S3.** The *in situ*  $^{19}\text{F}$  NMR spectra of the cocatalyst (A), Al/cocatalyst pair (B), Al/cocatalyst/BO and Al/cocatalyst/BO (C and D).

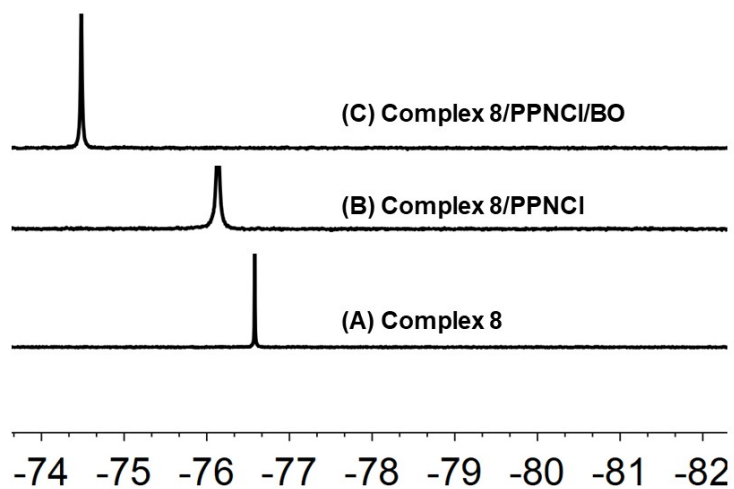

**Figure S4.** The  $^{19}\text{F}$  NMR spectra for the complex 8 (A), complex 8/PPNCl (molar ratio =1:1) and complex 8/PPNCl/BO mixtures (1:1:3).

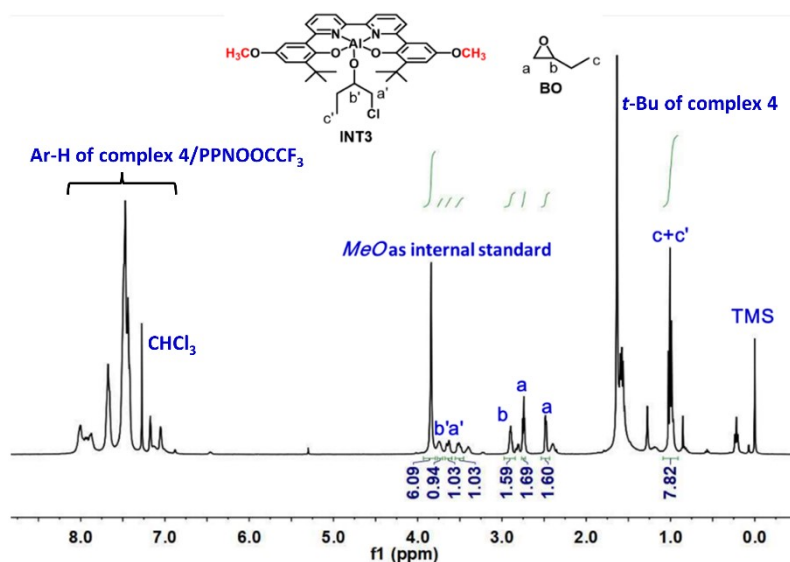

**Figure S5.** <sup>1</sup>H NMR peak assignments of complex 4/PPNOOCCF<sub>3</sub> combination with BO (molar ratio=1:1:3).

**Table S1.** Selected chemical shifts corresponding to the representative signal for alkoxides and their integral analysis (data were extracted from figure S4).

| Compound | Representative peaks                   | $\delta$ (ppm) | Integral |
|----------|----------------------------------------|----------------|----------|
| BO       | a (CH <sub>2</sub> CH-O)               | 2.77-2.72      | 3.29     |
|          |                                        | 2.53-2.43      |          |
|          | b (CH <sub>2</sub> CH-O)               | 2.98-2.84      | 1.59     |
|          | c (CH <sub>3</sub> CH <sub>2</sub> -)  | 1.13-0.90      | 4.80     |
| INT3A    | a' (CH <sub>2</sub> CH-O)              | 3.68-3.59      | 2.06     |
|          |                                        | 3.56-3.45      |          |
|          | b' (CH <sub>2</sub> CH-O)              | 3.77-3.70      | 0.94     |
|          | c' (CH <sub>3</sub> CH <sub>2</sub> -) | 1.13-0.90      | 3.00     |

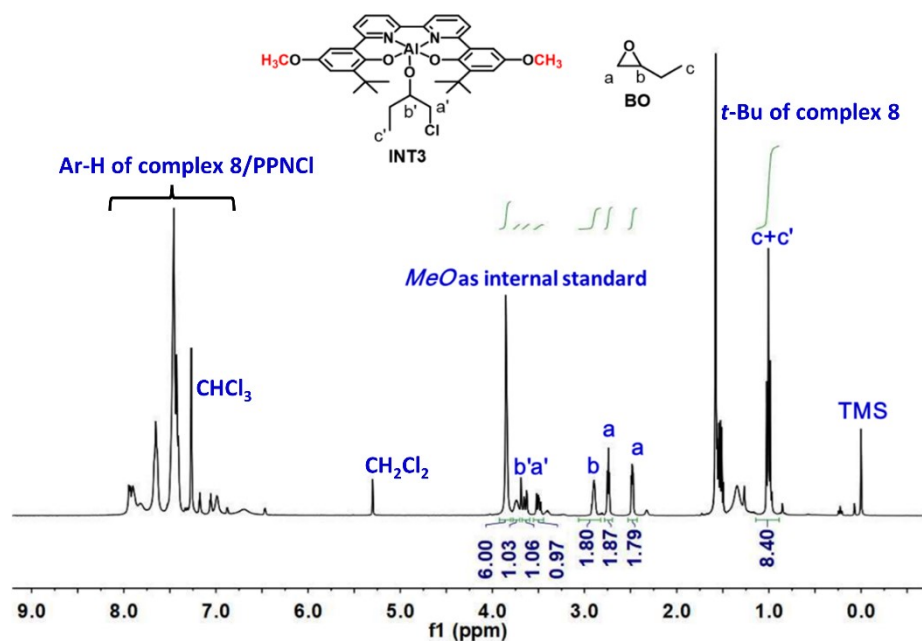

**Figure S6.**  $^1\text{H}$  NMR peak assignments of complex **8**/PPNCl combination with BO (molar ratio=1:1:3).

**Table S2.** Selected chemical shifts corresponding to the representative signal for alkoxides and their integral analysis (data were extracted from figure S5).

| Compound | Representative peaks             | $\delta$ (ppm)         | Integral |
|----------|----------------------------------|------------------------|----------|
| BO       | a ( $\text{CH}_2\text{CH-O}$ )   | 2.77-2.72<br>2.53-2.43 | 3.66     |
|          | b ( $\text{CH}_2\text{CH-O}$ )   | 2.98-2.84              | 1.80     |
|          | c ( $\text{CH}_3\text{CH}_2-$ )  | 1.13-0.90              | 5.40     |
| INT3A    | $\text{CH}_3\text{O-Ar}$         | 3.93-3.79              | 6.00     |
|          | a' ( $\text{CH}_2\text{CH-O}$ )  | 3.68-3.59<br>3.56-3.45 | 2.03     |
|          | b' ( $\text{CH}_2\text{CH-O}$ )  | 3.77-3.70              | 1.03     |
|          | c' ( $\text{CH}_3\text{CH}_2-$ ) | 1.13-0.90              | 3.00     |

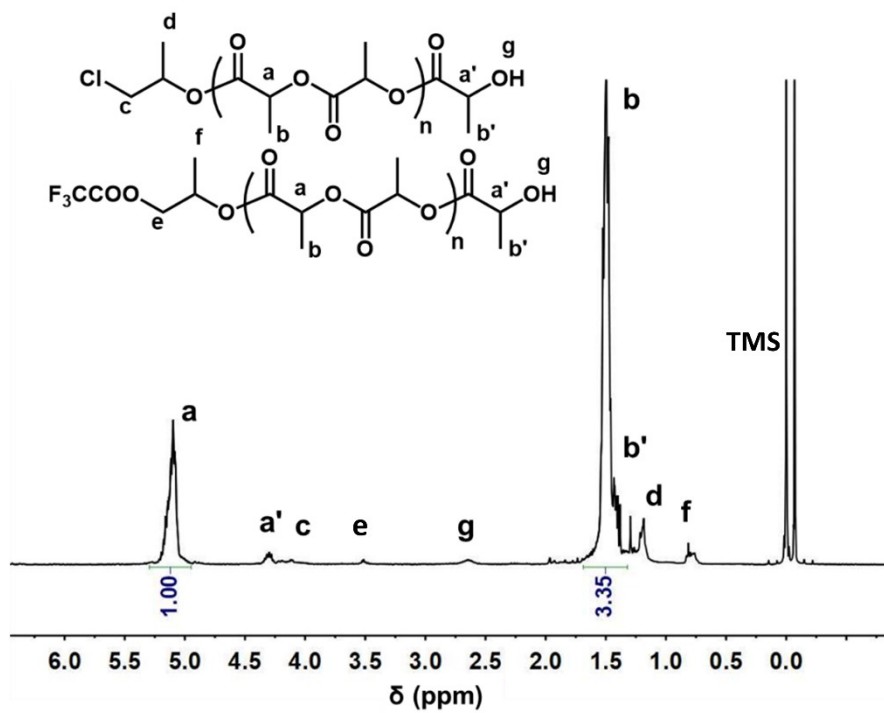

**Figure S7.** The  $^1\text{H}$  NMR spectrum of the PLA obtained by **8**/PPNCl.

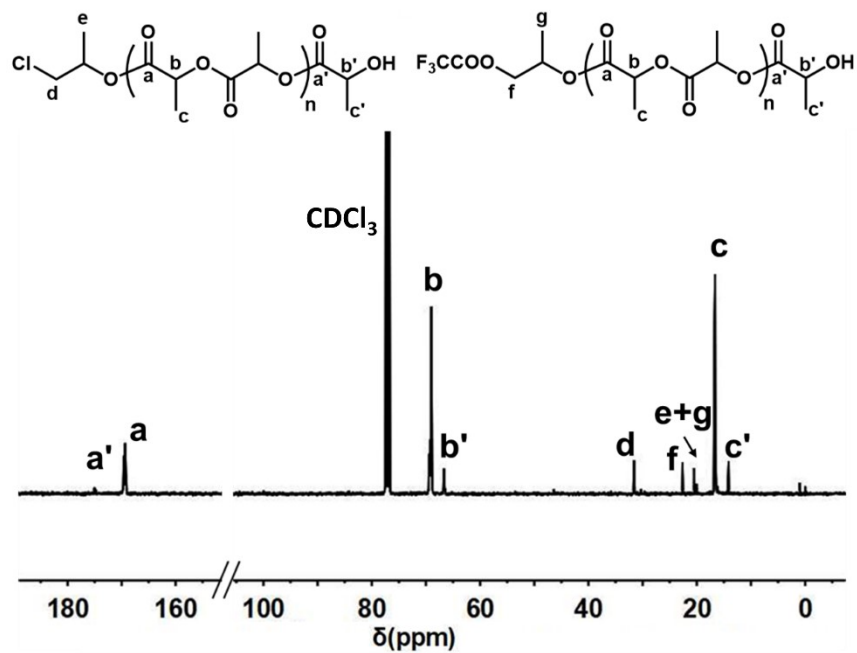

**Figure S8.** The  $^{13}\text{C}$  NMR spectrum of the PLA obtained by **8**/PPNCl.

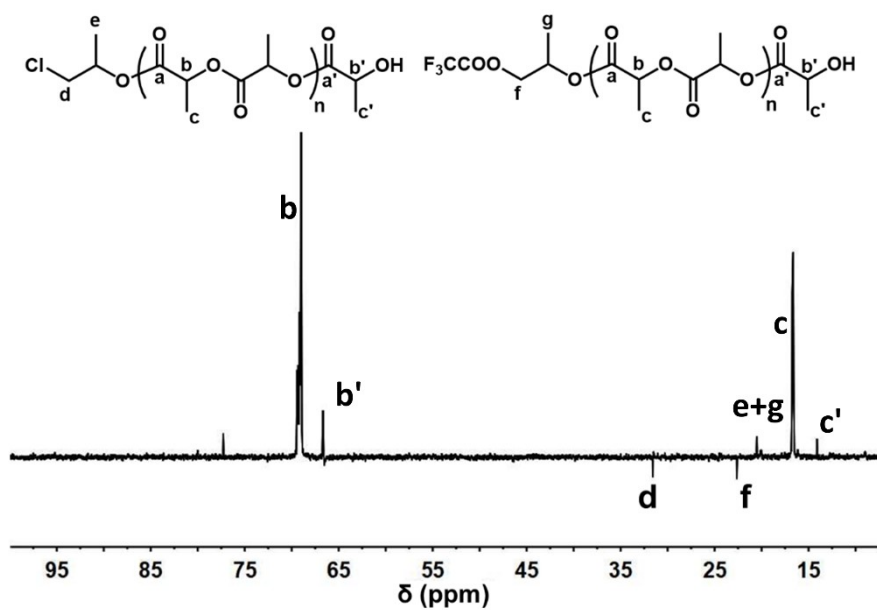

**Figure S9.** The DEPT(135) spectrum of the PLA obtained by **8**/PPNCl.

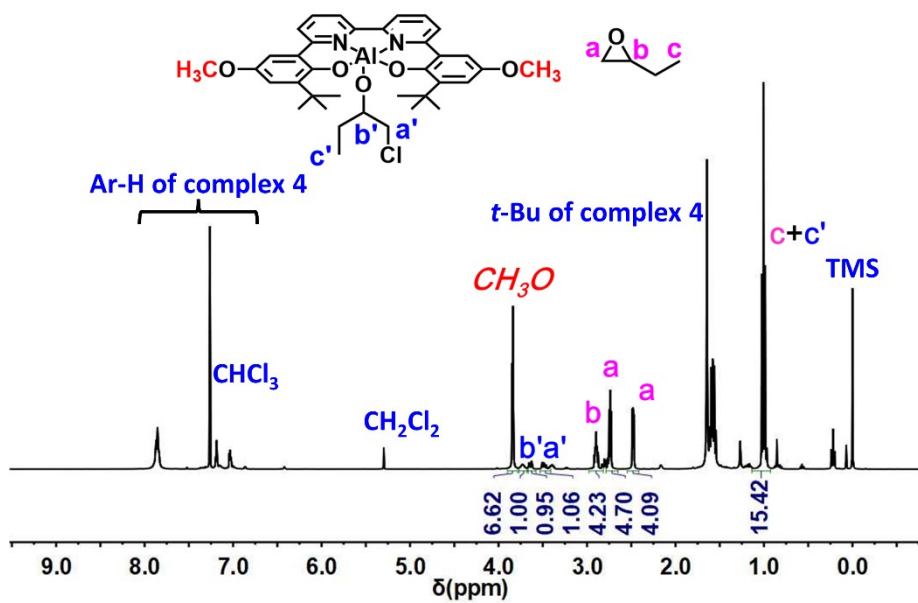

**Figure S10.**  $^1\text{H}$  NMR peak assignments of complex **4** combination with BO (molar ratio=1:5).
